# Supplementary material for: Intravoxel Incoherent Motion Diffusion-weighted MR Imaging for Monitoring the Immune Response of Immunogenic Chemotherapy
Source: Research Square preprint supplement (doi:10.21203/rs.3.rs-630224/v1), 2021-06-22
Supplement: Supplementary file 1 [file 38cd299ed8df8306d27c5c24.docx]

Table 1 Comparisons of the IVIM-DWI parameters between the CPA group and control group of the GL261 model

| Parameter | baseline | D6 | D12 |
| --- | --- | --- | --- |
| **D(×/s)** | | | |
| Control | 0.66 (0.09) | 0.62 (0.14) | 0.52 (0.07) |
| CPA | 0.66 (0.09) | 0.86 (0.23) | 1.26 (0.08) |
| *P* value | *P*=0.711 | *P*=0.003** | *P*=0.001** |
| ***D**(×/s)** | | | |
| Control | 3.97 (0.75) | 6.30 (1.20) | 4.80 (0.78) |
| CPA | 3.82 (0.59) | 2.56 (0.46) | 3.53 (0.38) |
| *P* value | *P*=0.578 | *P=*0.001** | *P*=0.001** |
| ***f*** | | | |
| Control | 0.21 (0.04) | 0.55 (0.04) | 0.49 (0.08) |
| CPA | 0.29 (0.06) | 0.18 (0.06) | 0.23 (0.06) |
| *P* value | *P*=0.137 | *P=*0.001** | *P=*0.001** |
| ***fD**(×/s)** | | | |
| Control | 1.00 (0.28) | 3.25 (0.51) | 2.36 (0.38) |
| CPA | 1.02 (0.29) | 0.47 (0.17) | 0.77 (0.31) |
| *P* value | *P*=0.579 | *P=*0.001** | *P=*0.003** |

Note: The data are the median, and the interquartile range is in parentheses. The Mann-Whitney U test was used to compare the differences in IVIM-DWI parameters between the two groups.

Table 2 Comparisons of IVIM-DWI parameters in breast cancer patients with 2 cycles of neoadjuvant chemotherapy

| Parameter | Baseline | Cycle1 | Cycle2 | H | P |
| --- | --- | --- | --- | --- | --- |
| **D(×/s)** | 0.58  （0.47-0.66） | 0.84  （0.70-0.99） | 1.11  （0.75-1.40） | 8.77 | 0.012 |
| ***D**(×/s)** | 10.35  （10.2-14.0） | 7.22  （5.1-8.49） | 6.63  （3.99-7.99） | 7.73 | 0.021 |
| ***f*** | 0.34  （0.27-0.38） | 0.19  （0.16-0.27） | 0.11  （0.064-0.13） | 9.27 | 0.01 |
| ***fD**(×/s)** | 3.60  （2.88-5.17） | 1.18  （1.0-2.23） | 0.80  （0.29-0.98） | 9.27 | 0.01 |

Note: The data are the median, and the interquartile range is in parentheses. The Kruskal-Wallis test was used to compare the differences in IVIM-DWI parameters.
